# Supplementary material for: Differential microRNA expression profiling in primary tumors and matched liver metastasis of patients with colorectal cancer
Source: PubMed Central journal article supplement (PMC5482617; doi:10.18632/oncotarget.16206), 2017-03-15
Supplement: oncotarget-08-35783-s001.pdf [file oncotarget-08-35783-s001.pdf]

## Differential microRNA expression profiling in primary tumors and matched liver metastasis of patients with colorectal cancer

### Supplementary Materials

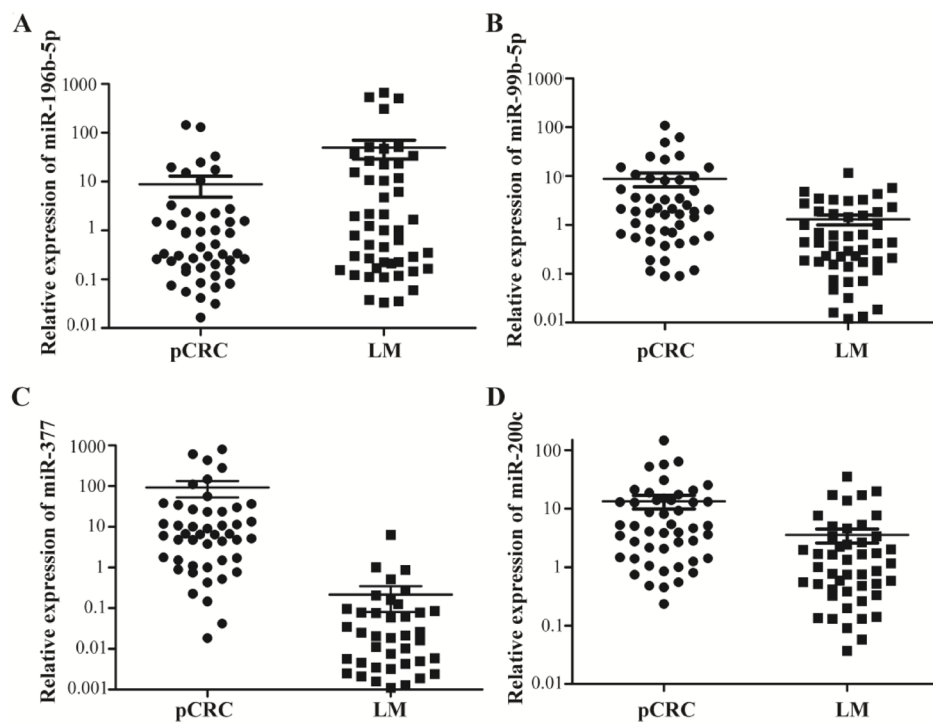

**Supplementary Figure 1: Differential expression of miRNAs between primary tumor and liver metastasis tissues in 48 colorectal cancer patients.** miRNA-196b-5p (A,  $P = 0.046$ ) was up-regulated in liver metastasis tissues compared to primary colorectal cancer, while miR-99b-5p (B,  $P = 0.007$ ), miR-377 (C,  $P = 0.026$ ) and miR-200c (D,  $P = 0.009$ ) were down-regulated. LM, liver metastasis; miRNA, microRNA; pCRC, primary CRC.
